# Supplementary material
Source: Research Square preprint supplement (doi:10.21203/rs.3.rs-8796553/v1)
Supplement: Supplementary file 1 [file f24b1da216866dee4da4f568.xlsx]

## Sheet: Sheet1 
Table S1 Genotypes and phenotypes of the mapping populations based on traditional QTL mapping.
Marker type: 2 for 082; 1 for F1; 0 for Ye107; -1 for missing markers
Genotype
Marker	FT1	FT2	FT3	FT4	FT5	FT6	FT7	FT8	FT9	FT10	FT11	FT12	FT13	FT14	FT15	FT16	FT17	FT18	FT19	FT20	FT21	FT22	FT23	FT24	FT25	FT26	FT27	FT28	FT29	FT30	FT31	FT32	FT33	FT34	FT35	FT36	FT37	FT38	FT39	FT40	FT41	FT42	FT43	FT44	FT45	FT46	FT47	FT48	FT49
phi064	2	1	0	2	0	1	2	0	2	0	2	1	2	2	0	1	2	2	2	2	0	0	0	1	2	1	1	2	1	2	1	0	0	0	1	1	1	1	1	-1	-1	2	2	1	1	0	0	2	1
umc1725	1	1	0	2	0	1	2	1	1	0	2	1	2	2	0	1	2	2	2	2	0	0	0	1	1	1	1	2	1	2	1	0	0	1	1	1	1	1	1	0	0	2	2	1	1	0	0	1	1
phi227562	1	1	0	2	0	1	2	0	2	0	2	-1	2	2	0	1	2	2	2	2	0	0	0	1	1	1	1	2	1	2	1	0	0	-1	1	-1	1	1	-1	-1	0	2	2	-1	1	0	0	-1	2
umc1538a	1	1	0	1	0	1	2	0	2	0	2	1	1	2	0	1	2	1	2	2	0	0	0	1	1	1	1	2	0	2	1	-1	0	1	0	0	1	1	1	0	0	2	2	1	1	0	0	0	1
bnlg1347a	1	1	1	1	0	1	1	0	2	1	2	0	1	1	0	1	1	1	2	2	1	0	0	1	1	1	1	2	0	1	2	1	1	1	0	1	1	1	1	2	0	2	1	1	1	0	1	0	1
umc2223	1	1	1	1	0	1	1	0	2	1	2	0	1	1	0	1	1	1	2	2	1	0	0	1	1	1	1	2	0	2	2	1	1	1	0	1	1	1	1	1	0	2	1	1	1	0	1	0	1
phi308707	1	1	1	1	0	1	1	0	2	1	2	-1	1	1	0	1	1	1	2	2	1	0	0	1	1	1	1	2	0	2	2	1	1	1	0	1	1	1	1	1	0	2	1	1	1	0	1	0	1
umc1534	0	0	1	1	1	1	1	0	2	1	2	0	-1	1	0	1	1	1	2	2	1	0	0	1	0	1	1	1	0	1	2	1	1	1	0	1	1	1	1	2	0	2	1	1	1	0	1	0	1
umc1306	-1	0	1	1	0	2	1	0	2	1	2	1	1	1	0	1	1	1	2	1	1	0	0	1	0	1	1	1	0	1	1	1	1	1	0	1	1	1	1	2	0	2	1	1	1	0	1	0	1
umc2047	-1	1	1	1	0	2	2	0	-1	1	2	1	1	1	0	1	1	1	2	1	-1	0	0	1	0	1	1	0	0	-1	1	1	1	1	0	1	1	1	1	2	0	2	1	1	1	-1	1	0	1
umc1991	2	1	1	0	1	2	1	1	2	1	2	1	1	0	1	1	1	1	2	1	1	0	1	1	0	1	-1	0	0	0	1	1	1	1	1	1	1	1	0	2	0	2	0	0	2	0	2	0	1
umc2029	2	1	2	1	1	2	1	1	2	1	2	2	-1	0	1	1	1	1	2	1	1	0	2	1	0	2	1	0	0	0	1	1	1	1	0	1	1	1	0	2	0	2	0	0	1	0	2	0	1
umc1128	2	1	2	1	1	1	1	1	2	1	2	2	1	0	1	1	0	1	2	1	1	0	2	1	0	2	1	0	0	0	1	1	1	1	0	1	2	2	0	2	0	2	0	-1	1	1	2	0	0
bnlg1025	2	1	2	1	1	1	1	1	2	1	2	2	1	0	1	1	2	1	0	1	1	0	-1	1	0	2	1	0	0	0	1	1	1	1	0	1	2	-1	0	2	0	2	0	0	1	1	2	0	0
umc1278	2	1	2	1	1	1	1	1	2	-1	2	2	1	0	1	1	0	1	2	1	2	0	2	1	0	2	1	0	0	0	1	1	1	0	1	1	2	2	0	2	0	2	0	0	1	1	2	-1	1
umc2560	1	0	2	1	1	1	2	1	2	1	2	2	2	0	2	1	1	1	1	1	1	0	2	2	1	2	0	0	0	0	2	1	1	0	1	0	2	2	0	2	0	-1	1	0	1	1	2	0	2
umc1972	1	0	2	1	2	1	2	1	2	-1	1	1	0	-1	0	0	-1	2	1	-1	1	0	2	2	1	2	-1	0	0	0	2	1	1	0	-1	0	2	2	0	2	0	2	2	0	-1	1	1	1	2
umc2083	1	0	2	1	1	1	2	1	2	1	1	1	2	0	2	1	1	0	1	1	1	-1	2	2	1	2	0	0	0	0	2	1	1	0	1	0	2	2	0	2	0	2	2	0	1	1	1	1	2
umc1906	1	0	2	2	1	1	2	1	2	1	1	1	2	0	2	1	1	0	0	1	1	0	2	2	1	2	0	0	1	0	2	1	1	0	1	0	2	2	-1	2	0	2	2	1	1	1	1	1	2
dupssr26	1	0	2	2	2	1	0	1	1	1	-1	1	2	0	2	0	1	0	0	1	1	-1	1	2	2	2	0	0	1	1	2	-1	1	1	1	0	1	2	0	2	1	1	2	1	1	1	0	1	2
umc1243	-1	-1	2	2	1	0	1	1	1	-1	1	1	2	0	2	0	1	0	0	1	1	0	1	2	1	2	0	0	1	1	2	0	1	1	1	0	1	2	0	2	-1	2	2	1	1	1	0	1	2
bnlg2086	2	-1	2	2	1	0	1	1	1	1	1	1	2	0	2	0	1	0	0	1	1	2	1	2	2	2	0	0	1	1	2	0	1	1	1	0	1	2	0	2	0	2	2	1	1	1	0	2	2
bnlg2180	1	0	2	2	1	0	1	1	-1	-1	1	1	2	0	2	0	1	0	0	0	1	0	1	2	2	1	0	0	1	1	2	0	1	1	1	0	1	2	0	1	1	1	2	1	1	1	0	1	2
umc1598	1	0	2	2	1	0	1	1	1	1	1	1	2	0	2	0	1	0	0	0	1	0	1	2	2	1	0	0	1	1	2	0	0	1	1	0	1	2	0	1	1	1	2	1	1	1	0	1	2
phi109275	1	0	2	2	1	0	1	1	1	1	1	1	2	0	2	0	1	0	0	0	1	0	1	2	2	1	0	0	1	1	2	0	0	1	1	0	1	2	0	1	1	1	2	1	1	1	0	1	2
umc1397	1	0	2	2	1	0	1	1	1	1	1	1	2	0	2	0	1	0	0	1	1	1	1	2	2	1	0	0	1	1	2	0	0	2	1	0	1	2	1	1	1	1	2	1	1	1	1	-1	2
bnlg1484	1	1	2	0	1	2	1	1	1	1	1	2	2	0	1	0	1	0	0	1	1	1	1	2	2	1	0	0	1	0	2	0	0	2	1	0	1	2	1	1	1	1	2	1	1	1	1	1	2
umc1073	1	1	2	2	1	0	1	1	1	1	1	1	2	0	1	0	1	0	0	1	1	1	1	2	2	1	0	0	1	1	2	0	0	2	1	0	1	2	1	1	1	1	2	1	1	0	1	2	2
bnlg1007	1	1	2	2	1	0	1	1	1	1	1	1	2	0	1	0	1	1	0	1	0	1	1	2	2	1	0	0	2	1	2	1	0	2	1	0	1	2	1	0	1	1	2	1	1	1	1	2	2
bnlg1429	-1	1	2	2	1	0	1	1	-1	1	2	1	2	0	1	0	1	1	0	1	0	1	0	2	2	1	0	0	2	1	2	1	0	2	1	0	1	-1	1	0	1	1	2	1	1	1	1	2	2
umc2224	0	1	2	2	2	0	1	1	1	1	2	1	2	0	1	0	1	1	0	1	1	1	1	2	2	1	0	0	2	1	2	1	0	2	1	0	1	2	1	0	1	1	1	0	1	1	1	2	2
umc1516	0	1	1	1	1	1	1	1	1	2	1	0	1	1	1	1	0	1	1	1	1	2	1	1	2	2	1	1	1	0	1	2	1	1	0	1	1	1	2	2	1	1	0	1	0	2	1	2	0
phi090	0	1	1	1	1	1	1	1	1	2	1	0	1	2	0	1	0	2	1	1	1	2	1	1	2	2	1	1	2	0	1	2	0	1	0	1	1	0	2	2	1	1	1	1	0	2	1	2	0
umc2205	-1	1	1	1	1	1	1	1	1	2	1	1	1	2	0	1	0	1	1	1	1	2	1	1	2	2	1	2	2	0	1	2	0	1	0	1	1	0	2	2	1	1	1	1	0	1	1	2	0
umc1536	0	1	1	1	1	1	1	1	1	2	1	1	1	2	0	1	0	1	1	1	1	2	1	1	2	2	1	2	2	0	1	2	0	2	0	1	1	0	2	2	1	1	1	1	0	1	1	2	0
bnlg1329	0	1	0	1	1	1	1	1	1	2	1	1	1	2	0	-1	0	1	1	1	1	2	1	1	2	1	2	2	2	0	-1	2	0	1	0	1	1	0	2	2	1	2	1	1	0	1	0	1	1
umc1004	1	1	0	2	1	1	1	1	1	2	1	1	1	2	0	1	0	1	1	1	1	2	1	1	2	1	2	2	2	0	1	2	0	0	0	1	1	0	2	2	1	2	1	2	0	1	0	1	1
umc1755	1	1	0	2	1	1	1	1	1	1	1	1	1	2	0	1	0	1	1	1	1	2	1	2	2	1	2	2	2	0	1	2	0	0	0	1	1	0	2	2	1	-1	-1	-1	0	1	0	1	1
umc1079	1	1	0	2	1	1	1	1	2	1	1	1	1	2	0	1	0	1	1	1	1	2	1	2	2	1	2	2	2	0	1	2	0	0	0	1	1	0	2	2	1	2	1	2	0	0	0	1	1
umc2079	1	1	0	2	1	1	1	1	2	1	1	1	1	2	0	1	0	-1	1	1	1	2	1	2	1	1	2	2	2	0	1	2	0	0	0	0	1	0	2	2	1	2	1	2	0	0	0	1	1
umc1541	1	1	0	2	1	1	1	1	2	1	0	1	1	1	1	1	0	0	1	1	1	2	1	2	1	1	2	2	2	0	1	2	0	0	0	0	1	0	2	2	1	2	1	2	0	0	0	2	1
umc2248	1	1	0	1	1	1	1	1	2	1	0	1	1	1	1	1	1	0	1	1	1	2	1	2	1	1	2	2	2	0	1	1	0	0	0	0	1	0	2	2	1	2	1	2	0	1	0	2	1
umc1579	1	1	0	-1	1	1	1	1	2	1	0	1	1	0	1	1	0	0	1	1	1	2	1	2	1	0	2	-1	2	0	1	2	0	0	0	0	1	-1	-1	-1	-1	-1	1	2	0	0	0	1	1
umc2403	-1	-1	0	1	2	2	1	1	0	-1	0	1	1	1	1	1	1	2	2	1	0	2	2	2	1	1	1	-1	1	0	0	2	2	2	-1	-1	1	0	-1	2	-1	2	1	1	1	1	0	2	1
umc1227	1	1	0	1	2	2	1	1	0	1	0	1	0	1	2	1	1	2	1	1	0	2	2	2	1	1	1	1	0	0	1	2	2	2	1	0	1	0	1	2	2	1	1	0	1	1	0	2	1
umc1542	1	-1	0	2	2	2	1	1	0	1	0	1	0	1	2	1	1	2	1	1	0	2	2	2	1	1	1	1	0	0	1	2	2	2	1	0	1	0	1	2	2	1	1	0	1	1	0	2	1
umc1165	1	1	0	1	1	-1	1	1	0	1	0	1	0	1	2	1	1	-1	1	1	0	2	2	2	1	1	1	1	0	-1	1	2	2	2	1	0	1	0	1	2	1	-1	1	0	1	1	0	2	1
phi96100	-1	1	0	1	2	2	0	1	0	1	0	1	0	1	2	1	1	2	1	1	0	2	2	2	1	1	1	1	0	0	1	2	2	2	1	1	1	0	1	2	1	1	1	0	1	1	0	2	1
umc1622	2	2	0	1	1	2	0	1	0	1	0	1	0	2	2	1	2	2	1	1	0	2	2	2	1	1	1	1	0	0	1	2	2	2	2	1	2	1	1	2	1	1	1	0	1	1	0	2	1
mmc0001	1	2	0	1	2	0	2	0	2	0	2	1	1	1	2	2	0	1	1	1	1	0	0	0	1	0	2	1	1	1	2	1	1	0	1	1	1	0	0	1	1	2	1	0	1	0	0	0	0
bnlg1257	0	2	2	1	2	0	2	1	1	0	1	1	1	2	2	2	0	0	1	1	1	0	0	1	0	1	2	1	0	2	2	1	1	0	1	1	1	1	0	1	1	1	2	0	1	1	1	0	0
umc1320	1	-1	2	1	0	0	1	2	-1	0	0	1	1	1	1	2	0	0	2	1	0	0	0	1	0	1	1	1	0	1	2	1	1	0	1	1	1	1	0	1	1	0	2	0	1	1	1	0	1
umc2274	0	2	-1	-1	1	0	1	2	1	0	0	2	1	1	1	-1	0	0	2	1	0	1	0	1	0	1	0	1	0	1	2	1	1	1	1	1	1	1	0	0	1	0	2	0	1	1	1	1	1
bnlg1779	1	2	2	2	1	0	1	2	1	0	-1	2	1	1	1	2	0	0	2	1	0	1	0	1	0	1	0	1	0	1	2	1	1	1	1	1	1	1	0	1	1	0	2	0	1	1	1	1	1
bnlg1605	1	2	2	2	1	1	1	2	0	0	0	2	2	1	1	2	0	0	2	1	0	1	0	1	0	1	0	1	0	0	2	1	1	1	1	0	0	1	0	1	1	0	2	1	2	1	2	1	1
bnlg1160	-1	2	1	2	1	0	1	2	0	0	0	2	2	1	1	1	0	0	2	1	0	1	0	1	0	1	0	1	0	0	2	1	1	1	1	0	0	1	1	1	1	0	2	1	2	1	2	-1	1
bnlg1951	1	2	1	2	1	0	1	2	0	0	0	2	2	1	2	1	0	0	2	1	0	1	0	1	0	1	0	1	0	0	2	1	1	1	1	0	0	1	1	1	1	0	2	1	2	1	2	1	1
phi102228	1	2	1	2	1	0	1	2	0	1	0	1	2	1	2	1	0	0	1	1	0	1	0	1	0	1	0	1	0	0	2	1	1	1	1	0	0	1	1	1	1	0	2	1	2	1	2	1	1
bnlg1350	1	2	1	2	1	0	1	2	0	1	0	1	2	1	2	1	0	0	1	1	0	1	1	1	0	1	0	1	0	0	2	1	1	1	1	0	0	1	1	1	1	0	2	2	2	1	2	1	1
bnlg1449	2	2	1	2	1	0	1	2	0	1	0	0	2	1	2	1	0	0	1	1	0	1	1	1	1	1	0	0	1	0	1	1	0	1	0	0	0	1	1	1	1	0	2	2	2	2	2	2	1
bnlg1117	1	1	1	2	1	0	1	2	0	1	0	0	2	1	2	1	0	0	1	2	0	1	1	1	1	1	1	0	1	0	1	1	0	1	0	0	0	1	0	0	1	0	2	2	2	2	2	2	1
umc1307	1	0	1	2	1	0	1	2	0	1	0	0	2	1	1	1	0	0	1	2	0	1	1	1	1	1	1	0	1	0	1	1	0	1	0	0	0	1	0	0	1	0	2	2	2	2	2	2	1
umc2002	1	0	1	2	1	0	1	2	0	1	0	0	2	1	1	1	0	0	1	2	0	0	1	1	1	1	1	0	2	0	1	1	0	1	0	0	0	2	0	0	1	0	2	2	2	2	2	2	1
phi053	-1	0	1	2	1	0	-1	2	-1	1	0	0	2	1	1	1	0	0	1	2	-1	0	2	1	1	1	1	0	2	0	1	1	0	1	0	0	0	2	0	0	1	0	2	2	2	2	2	2	1
umc1223	-1	0	-1	2	1	0	1	2	0	-1	0	0	2	1	1	1	0	0	1	2	0	-1	2	0	1	1	1	-1	2	0	1	0	0	1	-1	0	0	2	0	0	1	0	2	2	2	2	2	2	1
umc1504	1	0	1	2	2	0	1	2	0	1	0	0	2	1	1	1	0	0	1	2	0	0	2	1	1	1	1	0	2	0	1	0	0	1	0	0	0	2	0	0	1	0	2	2	2	2	2	2	1
bnlg1019a	1	-1	1	2	1	1	0	2	0	1	0	0	2	1	1	1	0	0	1	2	0	0	0	1	0	1	1	0	2	0	1	0	0	1	0	0	0	2	0	0	1	0	2	2	2	2	2	2	1
bnlg1452	1	0	1	2	1	1	0	2	0	1	0	-1	2	1	1	1	0	0	1	2	1	0	1	1	0	1	1	0	2	0	1	0	0	1	0	0	0	2	0	0	1	0	2	2	2	2	2	2	1
umc2033	1	0	1	2	1	1	0	1	-1	1	0	1	2	1	1	1	0	0	1	2	0	0	1	1	0	1	1	0	2	0	1	0	0	1	0	0	0	2	0	0	1	0	2	2	1	2	2	2	1
bnlg2136	1	0	1	2	1	1	0	2	0	1	0	1	2	1	1	1	0	0	1	2	0	0	1	1	0	1	1	-1	2	0	1	0	0	1	0	0	0	2	0	0	0	0	2	2	1	2	2	2	1
umc1965	1	1	1	2	1	1	0	2	0	1	0	1	2	1	1	1	0	0	0	2	0	0	2	2	0	1	1	0	2	0	1	0	0	1	0	0	0	2	0	0	0	0	2	2	1	2	2	2	1
bnlg1325	1	1	1	2	-1	1	0	2	0	2	0	1	0	1	1	0	1	0	1	2	0	0	1	1	0	1	0	0	1	0	1	0	2	1	0	0	1	2	0	2	0	0	1	1	1	2	2	2	1
umc1458	1	1	0	2	1	1	0	2	0	2	0	1	0	0	1	0	1	1	1	0	0	0	1	1	0	1	0	0	1	0	1	0	2	1	0	1	1	2	0	2	0	0	1	1	0	2	2	1	0
umc2377	1	1	0	2	1	1	0	2	0	2	0	2	0	0	-1	1	1	2	1	0	0	0	1	1	0	1	0	0	1	0	1	0	2	1	0	1	1	2	-1	2	1	0	1	1	1	2	2	1	0
umc2376	1	0	0	2	1	1	0	2	0	2	0	2	0	0	1	1	1	2	1	0	0	0	1	1	0	1	0	0	1	0	1	0	2	1	0	1	1	2	0	2	1	0	1	1	1	2	2	1	0
phi104127	1	-1	0	2	1	1	0	2	0	2	0	2	0	0	1	1	1	2	1	0	0	0	-1	1	0	1	0	0	1	0	1	1	2	1	0	1	1	2	0	2	1	0	1	1	1	2	2	-1	0
umc1892	1	1	0	2	1	1	0	2	0	2	0	2	0	0	1	1	2	2	1	0	0	0	1	1	0	1	0	0	1	0	1	1	2	1	0	1	1	2	0	2	1	0	1	1	1	2	2	1	0
umc2118	1	2	0	2	1	1	0	1	0	2	0	2	0	1	0	1	2	2	1	0	1	1	2	1	0	1	0	1	1	0	1	1	2	1	2	1	1	2	0	2	1	0	1	1	1	1	2	1	0
umc2280	2	1	1	0	2	0	2	1	2	1	1	2	1	2	2	1	2	1	2	1	2	1	2	1	2	2	1	0	2	2	1	0	2	1	2	1	0	0	1	1	1	1	0	-1	2	2	1	2	1
umc1117	2	0	1	0	2	0	2	1	2	1	1	2	1	1	1	1	2	1	2	1	1	1	2	0	2	2	1	0	2	1	1	0	2	1	2	1	0	0	1	1	1	1	0	1	2	2	1	2	1
umc1963	2	0	1	0	2	0	2	1	2	1	1	2	1	1	1	1	-1	1	-1	-1	-1	1	-1	0	2	2	1	0	-1	1	1	0	2	1	2	1	0	0	1	1	1	1	0	1	2	2	1	2	1
bnlg490	2	0	1	0	2	0	2	1	2	1	1	2	-1	1	1	2	1	1	2	0	1	1	2	0	2	2	1	0	2	1	1	0	2	2	2	1	0	0	1	1	1	1	0	1	2	2	1	2	1
bnlg1937	2	0	1	0	2	0	2	1	-1	0	1	2	1	1	1	2	2	1	2	1	1	1	-1	0	2	2	1	0	1	1	1	0	1	1	2	1	0	0	1	1	1	1	0	1	2	2	1	2	1
bnlg1265	2	-1	1	0	2	0	2	1	2	0	1	2	1	1	1	2	2	1	2	1	0	1	2	0	1	2	1	0	0	1	1	0	1	1	2	1	0	0	1	1	1	1	0	1	2	2	1	2	1
umc2283	2	0	-1	0	1	0	2	1	2	0	-1	2	-1	1	1	2	2	1	2	1	1	1	2	-1	1	2	1	0	0	1	1	0	1	1	2	1	0	0	1	1	1	1	0	1	2	2	1	-1	1
bnlg1755	2	0	1	0	2	0	2	1	2	0	1	-1	1	1	-1	2	2	1	2	1	1	1	2	0	1	2	1	0	0	1	1	0	1	1	2	1	0	0	1	1	1	1	0	1	2	2	1	2	1
mmc0371	2	0	1	0	2	0	2	1	2	0	1	2	1	1	1	2	1	1	2	1	1	0	1	0	1	2	1	0	0	1	2	0	1	1	2	1	0	0	1	1	1	1	0	1	2	2	1	2	1
umc2391	2	0	1	0	2	0	1	-1	2	0	1	2	1	1	1	2	1	1	2	1	1	0	1	0	1	2	2	0	0	1	2	0	1	1	2	1	0	0	1	1	1	1	1	1	2	2	1	2	1
bnlg1784	2	1	1	0	2	1	1	1	2	1	1	2	1	1	1	2	1	1	2	1	0	0	1	0	1	2	2	0	0	1	1	1	2	1	2	1	0	0	1	1	1	1	1	1	2	2	1	2	1
dupssr34	2	1	1	0	1	1	1	1	2	1	1	2	1	1	1	2	1	1	1	1	0	0	1	0	1	2	2	0	0	1	1	1	2	1	2	1	0	0	1	1	1	1	1	1	2	2	1	2	1
umc1667	1	1	1	1	1	1	1	1	2	0	1	2	1	1	1	2	1	1	1	1	1	0	0	0	0	1	2	0	1	1	1	1	2	1	2	1	0	0	1	1	1	1	1	1	2	1	1	2	0
umc2405	1	1	1	1	1	1	1	1	2	0	1	2	1	1	1	2	1	1	1	1	1	0	1	0	0	1	2	1	1	1	1	1	1	1	2	1	0	0	1	1	1	1	1	1	2	1	1	2	0
umc1086	1	1	1	1	0	1	1	1	2	0	1	2	1	1	1	2	1	1	1	1	1	0	1	0	0	1	2	0	1	1	1	1	1	1	2	1	0	0	1	1	1	1	1	1	2	1	1	2	0
umc2188	1	1	1	1	0	1	1	1	2	0	0	2	1	1	1	2	1	1	0	1	1	0	1	1	0	1	0	2	1	1	1	1	1	1	2	1	0	0	1	1	1	1	1	1	2	1	1	2	0
umc1999	0	-1	1	1	0	1	1	1	2	0	0	2	0	1	1	2	1	1	0	1	1	0	0	1	0	1	2	0	1	1	1	1	1	1	2	1	0	0	1	1	1	1	1	1	2	1	1	1	0
umc1313	1	1	1	2	0	1	1	1	2	0	1	2	0	1	1	2	1	1	0	1	1	0	1	1	0	1	2	0	1	1	1	1	1	1	1	1	0	0	1	1	1	1	1	1	2	1	1	1	0
umc1101	0	2	0	2	0	0	1	1	2	0	0	2	0	0	1	2	1	1	0	1	1	0	1	1	0	1	2	0	2	1	2	2	0	1	1	0	0	0	1	2	1	1	1	0	2	1	1	1	0
umc1532	0	2	0	2	0	0	1	1	2	0	0	2	0	0	1	2	1	1	-1	1	1	0	1	1	0	1	2	1	2	1	2	2	0	1	1	0	0	0	1	2	1	1	1	0	2	1	1	1	0
umc1719	0	2	0	2	0	0	-1	1	2	0	1	2	0	0	1	2	2	2	0	0	1	1	1	1	0	1	2	1	2	1	2	2	0	1	1	0	2	0	1	2	1	1	1	0	2	1	2	0	0
bnlg1890	0	2	1	2	0	0	1	-1	2	0	1	2	0	0	1	2	2	2	0	0	1	1	1	1	0	1	1	1	2	1	2	2	0	1	1	0	2	0	1	2	1	1	1	0	2	1	2	0	1
umc1180	0	2	0	2	0	0	1	1	2	0	1	2	0	0	1	2	2	1	0	0	1	0	1	1	0	1	2	1	2	1	2	2	0	1	1	0	1	0	1	2	1	1	1	0	2	1	0	0	1
umc1153	2	1	1	0	0	1	2	2	1	1	1	1	2	1	2	0	1	1	0	2	1	2	1	1	1	0	1	1	1	2	2	0	1	0	1	0	2	2	2	1	1	1	1	0	0	1	2	1	2
umc1225	2	1	1	1	0	1	2	1	1	1	1	1	1	1	2	0	1	1	0	2	1	2	1	1	1	0	1	1	2	2	2	0	-1	0	1	0	2	2	2	1	1	1	1	1	0	0	1	1	-1
bnlg118	2	1	1	1	0	1	2	1	1	1	1	1	1	1	1	0	1	1	0	2	1	2	1	1	2	0	1	1	2	2	1	0	0	0	1	0	2	2	2	1	1	1	1	1	0	0	1	1	2
bnlg1118	2	1	1	2	0	1	2	-1	1	1	1	0	1	1	1	0	1	1	0	2	1	1	1	1	2	0	1	2	-1	2	1	0	0	0	1	0	2	2	2	1	1	1	1	1	0	0	1	1	2
umc2201	2	1	1	2	0	2	2	0	2	1	2	0	1	1	1	1	2	1	2	2	2	1	1	1	2	0	1	2	1	2	1	0	0	1	1	0	2	2	2	0	1	1	0	1	0	0	1	1	2
umc1019	2	-1	1	2	2	1	2	0	1	1	2	1	1	2	1	1	2	1	2	2	2	1	1	1	2	1	1	2	0	2	0	0	0	1	1	1	2	1	2	0	1	1	0	1	0	0	2	1	1
umc1722	2	1	2	2	2	2	2	0	1	1	2	1	1	2	0	1	2	2	2	2	2	1	1	1	2	1	0	1	0	1	0	0	0	1	1	1	2	1	2	0	1	1	0	1	0	0	2	1	1
umc2386	2	1	1	2	2	1	2	0	1	1	2	1	1	2	0	2	2	1	2	2	2	1	1	1	2	1	0	1	0	1	0	0	0	1	1	1	2	1	2	0	0	1	0	1	2	0	2	1	1
umc1155	2	1	2	2	2	1	2	0	1	1	2	1	1	2	0	2	2	1	2	2	2	1	1	1	2	1	0	1	0	1	0	0	0	1	1	1	2	1	2	0	1	1	0	1	0	0	2	1	1
umc1264	2	1	2	2	2	1	2	0	1	1	2	1	1	2	0	2	2	1	2	2	2	1	-1	1	2	1	0	1	1	1	0	0	1	1	1	1	2	1	2	1	1	1	0	1	0	0	2	2	1
phi333597	2	1	2	2	2	1	2	0	1	1	2	1	1	2	0	2	2	1	2	2	2	1	1	1	2	1	0	1	0	1	0	0	0	1	1	1	2	1	1	0	1	1	1	1	1	0	2	1	2
umc2111	2	2	2	1	2	1	2	0	1	1	2	1	1	2	0	2	2	1	2	2	2	1	1	0	1	1	0	1	0	1	0	0	0	1	1	1	2	1	1	0	1	1	1	1	0	0	2	1	2
dupssr10	2	1	2	1	2	1	2	0	2	2	2	1	1	2	0	2	2	1	2	2	1	0	2	0	1	1	0	1	0	1	1	0	1	1	1	1	0	1	1	0	1	1	1	1	0	0	1	1	2
bnlg1208	2	1	-1	1	2	1	2	0	2	2	2	1	1	2	0	2	2	1	2	2	1	0	2	0	1	1	0	1	0	1	1	0	1	1	1	1	0	1	1	0	1	1	1	1	0	0	1	1	2
bnlg653	2	1	2	1	2	1	2	0	2	2	2	1	1	2	0	2	2	1	2	2	1	0	2	0	1	1	0	1	0	1	1	0	1	1	1	1	0	1	0	0	1	1	1	2	0	0	1	1	2
umc1110	2	1	2	1	2	1	2	0	2	2	2	1	1	2	0	2	2	1	2	2	1	0	2	0	1	1	0	1	0	1	1	0	1	1	1	1	0	1	0	0	1	1	1	2	0	0	1	1	2
umc1274	1	1	2	1	2	1	2	0	2	2	2	1	1	2	0	2	2	1	2	2	1	0	2	0	1	1	0	1	0	1	1	0	0	1	1	1	0	1	0	0	1	1	1	2	0	0	1	1	2
umc1784	1	1	2	1	2	1	2	-1	2	2	1	1	1	2	0	2	2	1	2	2	1	0	2	0	1	1	0	1	0	1	1	0	0	1	1	1	0	1	1	0	1	1	1	2	0	0	1	1	2
umc1850	1	1	2	1	2	1	2	0	2	1	1	1	1	2	0	2	2	1	2	2	1	0	2	0	1	1	0	1	0	1	1	0	0	1	1	1	0	1	1	0	1	1	1	2	0	0	1	1	2
bnlg1660	1	0	1	1	2	1	2	1	2	1	1	1	1	0	2	0	0	1	0	0	1	2	0	2	1	1	0	1	0	0	1	1	1	1	1	1	0	1	2	0	1	1	-1	-1	-1	1	1	1	2
umc1365	1	0	1	0	1	1	2	2	2	1	1	-1	1	1	0	2	1	1	2	2	2	1	1	0	1	1	0	1	0	0	2	1	1	-1	1	1	0	1	2	1	1	1	1	2	1	2	1	1	1
umc1766	1	0	1	-1	2	2	2	2	2	1	1	0	1	1	-1	2	-1	1	2	2	2	1	1	0	1	0	-1	-1	0	0	2	1	1	1	-1	1	0	1	2	-1	1	1	1	2	1	2	1	1	1
umc1478	1	1	1	0	1	1	2	2	2	1	1	0	1	1	0	2	1	2	2	1	2	2	1	1	2	0	0	0	0	0	1	1	1	1	1	1	0	1	2	1	1	1	1	1	1	1	0	1	1
umc1325	1	0	1	0	1	1	2	1	2	-1	1	1	1	0	0	1	1	1	2	2	1	1	1	1	1	0	0	0	0	0	1	1	1	0	0	0	0	1	1	1	1	1	1	1	1	1	0	1	1
umc2292	1	0	1	0	0	2	1	2	1	1	1	1	1	0	0	0	1	1	2	1	1	2	1	1	2	0	1	0	0	1	1	2	1	0	0	0	0	1	2	2	1	2	1	1	1	1	0	1	1
umc1883	1	0	1	-1	0	1	0	1	0	2	0	2	2	0	1	1	1	1	2	1	2	0	2	2	2	0	0	0	0	1	0	1	0	1	1	0	0	1	1	1	2	1	0	2	0	2	1	1	1
umc2208	1	0	1	0	0	1	1	0	0	1	0	2	2	0	1	0	2	1	1	1	1	0	2	2	2	0	0	0	0	1	0	1	0	1	1	2	2	1	1	2	0	1	2	0	2	2	2	1	1
umc2310	1	-1	1	0	0	1	1	0	0	1	0	2	2	0	1	0	2	1	2	1	1	0	2	2	-1	0	0	0	0	1	0	1	0	1	1	2	2	1	1	2	0	1	2	0	2	2	2	1	1
umc1753	2	0	1	0	0	1	0	1	0	2	0	2	2	0	1	1	-1	2	2	1	2	0	2	2	2	0	0	0	1	1	0	1	0	1	1	2	2	1	1	2	0	1	2	0	2	2	1	1	1
bnlg1867	2	0	1	0	0	1	0	1	0	2	0	2	2	0	1	1	1	2	2	1	2	0	2	2	2	0	0	0	1	1	0	1	0	1	1	2	2	1	-1	-1	-1	-1	2	0	1	2	1	1	1
umc2315	2	0	1	0	0	2	0	1	1	2	0	2	2	0	1	1	1	2	2	1	2	0	2	2	2	0	0	0	1	1	0	1	0	0	1	2	2	1	1	2	0	0	2	0	2	2	1	1	1
phi077	2	0	1	0	0	2	0	1	1	-1	0	2	2	0	1	1	1	2	2	1	2	0	2	2	2	0	0	0	1	1	0	1	0	0	2	2	2	1	1	2	0	0	2	2	2	2	1	1	1
y1ssr	2	0	1	0	0	2	0	1	1	2	0	2	2	0	1	1	1	2	2	1	2	1	2	2	2	0	0	0	1	1	0	1	0	0	1	1	2	1	1	2	0	0	2	1	2	2	1	1	1
umc1006	2	0	0	0	0	2	0	1	1	2	0	2	2	0	1	1	1	2	2	1	1	1	2	2	2	0	0	0	1	1	0	1	0	0	1	1	2	1	1	2	0	0	2	1	2	2	1	1	1
bnlg2191	2	0	0	0	0	2	0	1	1	2	0	2	2	0	1	1	1	2	1	2	1	1	2	2	2	0	0	0	1	1	0	1	1	0	1	1	1	1	1	1	0	0	2	1	2	2	1	1	1
umc1014	2	0	0	0	0	1	0	1	1	2	0	2	2	0	1	1	1	1	1	2	1	1	1	2	2	0	1	0	2	1	1	1	1	0	1	1	1	1	0	1	1	0	2	1	1	2	1	1	0
umc2006	1	1	1	-1	0	1	0	1	1	2	0	2	2	0	1	1	1	1	1	2	1	1	1	2	2	0	1	0	2	1	1	1	1	0	0	1	1	1	0	1	1	0	2	1	1	2	1	1	0
umc2141	1	1	0	0	0	1	0	0	1	2	1	0	2	0	1	0	1	1	1	2	1	1	1	2	2	1	1	0	2	1	1	1	1	1	0	1	1	1	1	1	1	0	2	1	1	2	1	2	0
bnlg1732	1	0	0	0	1	1	0	0	1	2	1	0	2	0	1	1	1	1	1	1	1	1	1	2	0	1	1	0	2	0	2	0	1	0	1	1	1	1	1	1	1	0	1	1	1	1	1	2	0
umc1859	1	0	0	0	1	1	0	0	1	2	1	0	2	0	1	1	1	1	1	0	1	1	1	2	0	1	1	0	2	0	2	0	1	0	1	1	1	1	1	1	1	0	1	1	1	1	1	1	0
umc2170	1	0	0	1	1	2	1	0	1	2	1	0	2	0	1	1	1	1	1	0	1	0	1	1	0	1	1	0	2	1	2	0	1	0	1	1	1	2	1	1	1	0	1	1	1	1	1	1	0
phi299852	1	0	0	1	1	2	1	0	1	1	1	1	2	0	1	1	1	1	1	2	1	0	1	1	0	1	1	0	2	1	2	0	1	0	1	1	2	2	1	1	1	0	1	1	1	1	1	1	0
umc2165	2	1	0	1	1	2	1	0	-1	1	1	1	2	0	1	1	1	0	1	0	-1	0	1	1	0	1	1	0	2	1	1	0	1	0	1	2	2	2	1	1	1	0	1	1	1	1	1	1	0
bnlg1759	2	1	0	1	1	2	1	0	2	1	1	1	2	0	0	1	-1	0	1	0	1	0	1	1	0	1	1	0	2	1	1	0	1	0	1	2	2	2	1	1	1	0	1	1	1	1	1	1	0
umc1248	2	1	0	1	1	2	1	0	2	1	1	1	2	0	0	1	1	0	1	0	1	0	1	1	0	1	1	0	2	1	1	0	1	0	1	2	2	2	1	1	1	0	1	1	1	1	1	1	0
bnlg1740	-1	-1	0	1	1	2	1	0	2	1	1	1	2	0	0	1	-1	0	1	0	1	0	1	1	0	1	1	0	2	1	1	0	1	0	1	2	2	2	1	1	1	0	0	1	1	1	1	1	0
umc1621	2	1	0	2	1	2	1	0	2	1	1	1	2	0	0	1	2	0	1	0	1	0	1	1	0	1	0	0	1	1	1	0	1	0	1	2	2	2	1	1	1	0	0	1	1	1	1	1	0
umc2059	2	1	1	2	1	2	1	0	2	1	1	1	2	0	0	1	2	0	0	0	1	0	1	1	0	1	0	0	0	1	1	0	1	0	1	2	2	2	1	1	1	0	0	1	1	1	1	1	0
phi116	2	2	1	2	1	1	0	1	0	1	1	1	1	1	2	1	2	0	1	2	1	1	2	1	0	2	2	2	1	1	1	2	1	0	2	0	1	2	1	1	1	1	0	1	2	2	2	2	2
umc2197	2	2	2	2	1	0	0	1	0	1	-1	1	1	1	2	1	2	0	1	2	1	1	2	1	1	1	2	2	1	1	1	2	1	0	2	0	0	2	1	0	2	1	0	1	2	2	0	2	2
umc1671	2	2	1	2	1	0	0	1	0	1	0	1	2	1	2	1	2	0	1	2	1	1	2	1	1	1	2	2	1	1	1	2	1	0	2	0	0	2	1	0	2	1	0	1	2	2	0	2	2
umc1412	2	2	1	2	1	0	0	1	0	1	0	1	2	1	2	1	2	1	1	2	0	1	2	0	1	1	2	2	1	2	1	0	1	0	2	0	1	1	1	0	2	1	0	1	2	2	0	2	2
phi328175	2	1	0	1	1	1	1	2	0	1	0	0	1	1	1	2	0	2	0	2	1	0	2	1	2	2	1	1	1	2	1	0	2	0	1	0	0	1	0	1	2	0	1	2	2	2	0	0	2
umc1944	2	1	1	1	1	1	0	2	0	2	0	1	1	2	1	1	2	-1	1	2	1	1	2	0	2	0	2	2	1	1	1	0	1	0	2	1	1	1	1	1	2	1	0	1	2	2	0	1	2
bnlg1666	1	1	1	1	1	-1	0	1	0	2	0	1	1	2	1	1	2	2	1	2	1	1	1	1	2	0	2	2	1	1	1	0	1	1	2	1	1	1	1	1	2	2	0	1	2	2	0	1	1
phi114	2	1	1	1	1	2	0	1	0	2	0	1	1	2	1	1	2	2	0	2	1	1	1	1	2	0	2	2	1	1	1	0	2	1	2	2	1	1	1	1	2	2	0	1	1	1	0	0	1
umc1112	-1	1	2	1	1	2	0	1	0	2	0	1	1	2	1	1	2	2	0	1	1	1	1	1	2	1	2	2	1	1	1	0	2	1	2	2	1	0	1	1	2	2	0	2	1	1	0	-1	1
umc1456	1	1	1	0	-1	2	0	1	0	1	0	1	1	2	1	1	2	1	0	1	1	1	1	1	2	1	2	2	1	1	0	0	1	1	2	1	1	0	-1	1	-1	-1	0	2	0	-1	0	1	1
umc1718	1	1	1	0	1	2	0	1	0	2	0	1	1	2	1	1	2	2	0	1	1	1	1	1	2	1	2	2	1	1	0	0	1	1	2	1	1	0	1	1	2	2	0	2	0	1	0	1	1
umc1015	0	1	1	0	1	2	0	1	0	1	0	1	1	2	1	1	2	1	1	1	1	1	1	1	2	1	2	2	0	2	0	1	1	1	1	1	0	0	1	1	2	2	0	2	0	1	0	1	1
umc1409	0	1	1	0	1	1	1	1	0	1	0	1	1	1	1	0	2	1	1	1	1	1	1	1	0	1	2	2	0	2	0	1	0	1	1	1	0	0	1	1	1	2	0	2	0	2	0	1	1
phi034	0	1	1	0	1	1	1	1	0	1	0	1	1	1	1	0	2	1	1	1	1	1	1	1	0	1	2	2	0	2	0	1	0	1	1	1	0	0	1	1	1	2	0	2	0	2	0	1	1
umc1016	1	1	1	0	1	1	1	1	-1	1	0	1	1	1	1	0	2	1	1	1	1	1	1	1	0	1	2	2	0	2	0	1	0	1	1	1	1	0	1	1	1	2	0	2	0	2	0	1	1
umc2327	-1	1	0	0	1	1	1	1	0	1	0	1	1	1	1	0	-1	1	1	1	1	1	1	1	0	1	2	2	0	-1	0	1	0	-1	-1	1	0	0	1	1	1	2	0	2	0	-1	0	1	1
bnlg1367	1	2	0	0	1	0	1	1	1	0	1	0	0	0	1	1	1	2	1	1	2	2	1	1	0	1	2	2	2	2	1	1	0	1	2	1	1	0	0	2	1	2	0	1	0	2	1	1	1
umc1545	1	2	1	0	1	0	1	1	1	0	1	0	0	0	1	1	1	2	1	1	2	2	1	1	0	1	2	2	2	2	1	1	0	1	2	1	1	0	0	2	0	2	0	1	0	1	1	1	1
bnlg1131	1	1	1	1	0	1	1	1	1	1	0	1	1	2	0	2	0	1	1	0	0	0	1	1	1	1	0	0	0	1	1	0	2	1	1	1	2	0	1	1	1	2	0	1	0	2	1	2	1
umc1638	1	2	1	1	0	1	1	1	1	1	0	1	1	2	0	2	0	1	1	0	0	1	1	1	1	1	0	0	0	1	1	0	2	1	1	1	2	0	1	1	1	2	0	1	0	2	1	2	1
phi233376	1	2	1	1	0	1	1	1	1	1	0	1	1	2	0	2	0	2	1	0	0	1	1	1	1	1	0	0	0	1	1	0	2	1	1	1	2	1	1	1	1	2	0	1	0	2	1	2	1
phi080	1	2	1	1	0	1	1	1	1	1	0	1	1	2	0	2	0	2	1	0	0	1	1	1	1	1	0	0	0	1	1	0	2	1	1	1	2	1	1	1	1	2	0	1	0	2	1	2	1
bnlg1056	-1	2	1	1	0	1	1	0	1	1	0	1	1	2	0	2	0	2	1	0	0	1	1	1	1	1	0	0	0	1	0	0	2	1	1	1	1	1	1	1	1	2	1	1	0	2	1	2	1
umc1673	1	2	1	1	0	1	1	0	1	1	0	1	0	2	0	2	-1	1	1	0	0	1	1	1	1	1	0	0	0	2	0	0	2	0	1	1	1	1	1	1	1	1	1	1	-1	2	1	2	1
umc2052	1	2	1	1	0	1	1	0	1	1	2	1	1	2	0	2	0	2	1	0	0	1	1	1	1	1	0	0	0	2	0	0	1	1	1	1	1	1	1	1	1	1	1	1	0	2	1	2	1
umc1933	1	2	1	1	0	2	1	0	1	1	0	1	1	2	0	2	2	2	1	0	0	1	1	1	1	1	0	0	0	2	0	0	1	1	1	1	1	1	1	1	1	1	1	1	0	2	1	2	1
umc1384	2	2	2	0	0	1	1	0	1	1	0	1	-1	1	1	1	1	1	1	-1	1	1	1	1	0	1	1	0	0	2	0	0	1	1	1	1	1	2	1	1	1	1	1	1	0	2	1	-1	1
bnlg1823	2	2	2	0	0	1	1	0	1	1	0	1	0	1	1	2	1	2	1	1	1	1	-1	1	1	1	1	0	0	2	0	0	1	1	1	1	1	2	1	1	1	1	1	1	0	2	2	2	1
bnlg1065	2	2	2	2	1	1	1	0	2	0	0	1	0	1	1	2	1	2	1	1	1	1	1	1	1	0	1	0	1	2	0	0	1	1	1	0	1	2	2	1	1	1	2	1	1	2	2	2	1
bnlg240	2	2	2	0	1	1	1	0	2	0	1	0	0	0	1	1	1	2	1	1	1	1	0	1	1	0	1	0	1	1	0	0	1	0	0	0	1	2	2	0	1	1	2	1	1	2	1	2	1
bnlg1152	-1	2	2	0	1	1	1	0	2	0	1	0	0	0	1	1	1	2	1	1	1	1	0	1	1	0	1	0	1	1	0	0	1	0	0	0	1	2	2	0	1	1	2	1	1	2	1	2	2
umc1141	2	2	2	0	1	1	1	0	2	0	1	0	0	0	1	1	1	2	1	1	1	1	0	1	1	0	1	0	1	1	0	0	1	1	0	0	1	2	2	1	1	1	2	1	1	2	1	2	1
bnlg1782	2	2	2	0	1	1	1	0	2	0	1	0	0	0	1	1	1	2	1	1	1	1	0	1	1	0	1	0	1	1	0	0	1	1	0	0	1	2	2	1	1	1	2	1	1	2	1	2	1
umc1665	1	1	1	0	1	1	1	0	2	0	1	0	0	0	1	1	1	2	1	2	1	1	0	1	1	0	1	0	1	1	1	0	1	1	0	0	1	2	2	1	-1	1	2	1	1	2	1	2	1
umc2199	2	2	2	0	1	0	1	0	2	0	1	0	0	0	1	1	1	1	1	2	1	1	0	1	1	0	1	1	1	1	1	0	2	0	0	0	0	2	2	1	1	1	2	0	1	-1	1	-1	1
umc1121	2	2	2	0	1	1	1	0	2	0	0	0	0	0	1	1	1	1	1	2	1	1	0	1	1	0	1	1	1	1	1	0	2	1	0	0	1	2	2	1	1	1	2	1	1	2	1	2	1
bnlg2181	2	2	2	0	1	1	1	0	2	0	0	0	0	0	1	1	1	1	1	2	1	1	0	1	1	0	1	1	1	1	0	0	2	1	-1	0	1	2	2	1	1	1	2	1	1	2	1	2	1
umc2378	2	2	2	0	1	1	1	0	2	0	0	0	0	0	1	1	1	1	1	2	1	1	-1	1	1	0	1	1	1	1	0	0	2	-1	0	0	1	2	2	1	1	1	2	1	1	2	1	2	1
umc1130	2	2	2	0	1	1	1	0	2	0	0	0	0	1	1	1	1	1	1	2	1	1	0	1	1	1	1	1	1	1	0	0	2	1	0	0	1	2	2	1	1	1	2	1	1	2	1	2	1
umc1765	2	2	2	1	1	1	1	0	2	0	0	0	0	1	1	1	1	1	1	2	1	1	0	1	1	1	1	1	1	1	0	0	2	1	0	0	1	2	2	1	1	1	2	1	1	2	1	2	1
umc1460	2	2	2	1	1	1	1	0	2	0	0	0	0	1	1	1	1	1	2	2	1	1	0	1	1	1	1	1	1	1	0	0	2	1	0	0	1	2	2	1	1	1	2	1	1	2	1	2	1
phi100175	2	2	2	1	1	1	1	0	2	0	0	0	0	1	1	1	1	1	2	2	1	1	0	1	1	1	1	1	1	1	0	0	2	1	0	0	1	2	2	1	1	1	2	1	1	2	1	2	1
umc1735	2	2	1	1	1	1	1	0	2	0	0	0	0	1	1	1	1	1	2	2	1	1	0	1	1	1	1	1	1	1	0	0	2	1	0	-1	1	2	2	1	1	1	2	1	1	2	1	2	1
umc1617	2	2	2	1	1	1	1	0	2	0	0	0	0	1	1	1	1	1	2	2	1	1	0	1	1	1	1	1	1	1	0	0	2	1	0	0	1	2	2	1	1	1	2	1	1	2	1	1	1
umc2354	2	2	2	1	1	0	1	0	2	1	0	0	0	1	1	1	1	1	2	2	1	1	0	1	1	1	1	1	1	1	0	0	2	1	0	0	1	2	2	1	1	1	2	1	1	2	1	1	1
umc1377	2	2	2	1	1	1	1	0	2	1	0	0	0	1	1	1	1	1	2	2	1	1	0	2	1	1	1	1	1	0	0	0	2	1	0	0	1	2	2	1	1	1	2	1	1	2	1	1	1
bnlg2082	2	2	2	1	1	1	1	0	2	1	0	0	0	1	1	1	1	1	2	2	1	1	0	2	1	1	1	1	1	0	0	0	2	2	0	1	1	2	2	1	1	1	2	1	1	2	1	1	1
umc1415	2	2	1	1	1	1	1	0	2	2	2	2	2	1	1	1	1	1	2	2	1	1	0	1	1	1	1	1	1	1	0	0	2	1	0	0	1	2	2	1	1	1	2	1	1	2	1	1	1
umc1034	2	2	2	1	1	2	1	0	2	1	1	0	1	1	0	1	1	1	2	1	1	1	0	2	1	1	1	1	1	0	0	0	2	1	0	1	1	2	2	1	1	1	2	1	1	2	1	1	1
umc1778	2	2	2	1	1	1	1	0	2	1	0	0	0	1	1	1	1	1	2	1	1	1	0	2	1	1	1	1	1	0	0	0	2	1	0	1	1	2	2	1	1	1	2	-1	1	2	1	1	1
bnlg2235	2	2	1	0	-1	2	0	0	2	1	1	0	1	1	1	1	1	1	2	1	1	1	0	2	1	1	1	1	1	0	0	1	1	1	1	2	1	2	2	1	0	1	2	1	1	2	1	1	0
umc1304	2	1	1	1	1	2	0	0	2	1	1	1	1	1	0	1	0	1	2	1	1	1	0	2	2	-1	0	2	1	1	1	0	1	1	0	2	1	2	2	2	0	0	2	0	1	2	1	0	1
bnlg1724	0	1	1	1	0	0	1	1	1	1	1	1	0	1	1	1	2	0	1	2	1	2	1	1	0	0	1	1	0	1	2	1	1	2	1	2	1	1	2	1	2	1	1	1	1	0	0	0	0
bnlg1810	1	1	2	2	0	0	1	1	1	1	0	1	0	1	-1	1	2	0	1	2	1	2	1	1	0	0	1	2	1	1	1	1	0	2	-1	2	1	1	1	0	2	1	1	1	1	1	0	0	0
dupssr6	1	1	1	2	1	0	2	1	1	2	0	0	-1	1	2	1	2	0	1	2	2	1	1	2	1	0	1	2	1	1	0	1	0	1	2	2	1	1	1	0	2	1	2	1	1	1	1	0	1
umc1698	0	2	0	2	-1	0	2	1	1	2	0	0	0	0	2	1	1	0	1	2	2	0	0	2	1	0	1	2	1	1	0	1	0	1	2	1	1	1	1	0	1	1	1	1	1	1	1	1	1
umc1893	0	2	0	2	1	0	2	1	1	2	0	0	0	0	2	1	1	0	1	2	2	0	1	2	1	0	1	2	1	1	0	1	0	1	2	1	1	1	1	0	1	1	1	1	1	1	1	1	1
dupssr19	1	2	0	2	1	0	2	1	1	2	1	0	0	0	1	1	1	0	2	2	2	0	1	2	2	0	1	2	1	1	0	1	0	1	2	1	1	1	1	0	1	1	1	1	1	1	1	1	1
umc2338	1	2	0	2	1	0	2	0	1	2	1	0	0	0	1	1	1	0	2	2	-1	0	1	2	2	0	1	2	1	1	0	1	-1	1	2	1	1	1	1	0	1	1	1	1	1	1	1	1	1
umc1743	1	2	1	2	1	0	2	0	1	2	1	0	0	0	1	1	1	0	2	2	1	0	1	2	2	0	1	1	-1	1	0	1	0	1	2	1	1	1	1	0	1	1	1	1	1	1	1	1	1
umc2398	0	2	0	2	1	0	2	1	1	2	1	0	0	0	1	1	1	0	2	2	2	0	1	2	2	0	1	2	0	1	0	1	0	1	2	1	1	1	1	0	1	1	1	1	1	1	2	1	1
umc1492	0	2	0	2	1	0	2	1	1	2	1	0	0	0	1	1	1	0	2	2	2	0	1	2	2	0	1	2	0	1	0	1	0	1	2	1	1	1	1	0	1	1	1	1	1	1	2	2	1
umc2121	1	2	0	2	1	0	2	1	1	2	1	0	0	0	1	1	1	0	2	2	2	0	1	2	2	0	2	2	0	1	0	1	-1	1	2	1	1	1	1	0	1	1	1	1	1	1	2	2	1
umc1519	0	2	0	2	1	0	2	1	1	2	1	0	0	0	1	1	1	0	2	2	2	0	1	2	1	0	2	2	0	1	0	1	0	1	1	1	1	1	1	1	1	1	1	1	1	1	2	2	1
umc1657	0	-1	0	2	1	0	2	1	1	2	1	0	0	0	1	1	1	0	2	2	2	0	1	2	1	0	2	2	0	1	0	1	0	0	2	1	1	1	1	1	1	1	1	1	1	1	2	2	1
umc1357	0	2	0	2	1	0	2	1	1	2	1	0	0	0	1	1	1	0	2	2	2	0	1	2	1	0	2	2	0	1	0	1	0	0	2	1	1	1	1	1	1	1	1	1	1	1	2	2	1
umc1654	0	2	0	2	1	0	2	1	1	2	1	0	0	0	1	1	1	0	2	2	2	0	1	2	1	0	2	2	0	1	0	1	0	0	2	1	1	1	1	1	1	1	1	1	1	1	2	2	0
bnlg1191	1	0	0	2	2	2	1	1	1	2	1	0	0	0	1	1	1	1	2	2	2	0	2	1	1	0	2	2	0	1	0	1	-1	1	2	1	1	1	0	1	1	1	1	1	1	1	1	2	1
bnlg1525	0	0	0	2	2	2	1	1	0	2	1	0	0	0	1	1	1	0	2	2	2	0	2	1	1	0	2	2	0	1	0	1	1	1	2	2	1	1	0	1	1	1	1	1	1	1	1	2	1
phi236654	1	0	0	2	2	1	1	1	0	2	-1	0	0	1	1	1	1	0	2	2	2	0	2	1	1	0	2	2	0	1	0	1	2	1	2	2	1	1	0	1	1	1	1	1	1	1	1	2	1
umc1789	1	0	0	2	2	1	1	1	0	1	1	0	0	1	1	1	1	1	2	1	1	1	2	1	1	0	2	2	0	1	1	1	2	1	2	2	1	1	0	1	1	1	1	1	1	1	1	1	1
dupssr29	1	0	0	2	2	1	0	1	0	2	1	0	1	1	1	1	1	1	2	2	2	0	2	1	1	0	2	2	0	1	1	1	2	1	2	2	1	1	0	0	1	1	1	1	1	1	1	2	1
bnlg128	1	0	0	2	2	1	0	1	0	2	1	1	1	1	1	0	1	1	-1	2	2	0	2	1	1	0	2	2	0	2	2	1	2	2	2	2	1	1	0	0	1	1	1	1	1	0	1	1	0
bnlg1129	1	0	0	2	2	1	0	1	1	0	1	1	1	1	1	0	1	1	1	2	1	0	2	1	1	0	2	2	0	2	2	1	2	2	1	2	1	1	1	0	1	0	1	1	0	1	1	1	0
umc1318	1	2	1	1	-1	-1	2	1	-1	1	0	1	1	2	0	1	-1	-1	1	1	1	2	1	0	1	1	0	2	2	2	2	0	1	1	2	2	2	1	1	1	2	0	2	1	1	1	1	0	2
umc1291	-1	0	1	1	1	1	2	1	2	1	0	1	1	2	0	1	1	1	1	1	1	-1	1	0	1	1	0	2	0	2	2	0	1	1	2	2	2	1	1	1	2	0	2	1	1	1	1	0	2
bnlg1451	1	1	1	1	1	1	2	1	2	1	0	1	1	2	1	1	1	1	1	1	1	2	1	0	1	1	1	1	0	2	1	1	1	1	2	1	2	1	1	1	2	0	2	1	1	1	1	0	2
umc1432	1	1	1	1	1	1	2	2	2	1	0	1	1	2	1	1	1	1	1	1	1	0	1	2	1	1	1	1	0	2	1	1	1	2	2	0	2	1	1	1	2	0	2	1	1	1	1	0	2
mmc0501	1	1	1	1	1	1	2	2	2	1	0	1	1	2	1	1	1	0	1	1	1	2	1	-1	1	1	0	1	0	2	1	1	1	2	2	0	2	1	1	1	2	0	2	1	1	1	1	0	2
umc1582	1	1	1	1	1	1	1	2	1	1	0	1	1	2	1	1	1	0	1	1	1	2	1	0	1	1	0	1	0	2	1	1	1	2	2	0	2	1	1	1	1	0	2	1	1	1	1	0	1
umc2069	0	1	0	2	1	2	1	2	1	1	0	1	1	2	1	2	1	0	1	1	1	2	1	0	1	2	0	2	0	2	1	1	1	2	2	0	2	1	1	1	1	0	2	1	1	-1	-1	-1	-1
umc1962	1	1	0	1	1	1	1	2	1	1	0	1	0	2	1	2	1	1	0	1	1	2	1	0	1	1	0	1	1	0	1	1	1	2	2	0	2	1	1	1	1	0	2	1	2	1	1	0	0
bnlg1716	1	1	0	1	1	1	1	2	1	1	0	1	0	2	1	2	1	1	0	1	1	2	1	0	1	1	0	1	1	0	1	1	1	2	2	0	2	1	1	1	1	0	2	1	1	1	1	0	0
bnlg210	1	1	0	1	1	1	1	2	1	1	0	1	0	2	1	2	1	1	0	1	1	2	1	0	1	1	0	1	1	0	1	1	1	2	2	0	2	1	1	1	1	0	2	1	2	1	1	0	0
umc1345	1	1	0	1	1	-1	-1	2	1	1	0	1	0	2	1	2	1	1	0	1	1	2	1	0	1	1	0	1	-1	0	1	1	1	2	2	0	2	1	1	1	1	0	2	1	1	1	1	0	0
umc2017	1	1	0	1	1	-1	1	2	1	1	0	1	0	2	1	2	1	-1	0	1	1	2	1	1	1	1	0	1	1	0	1	1	1	2	2	0	-1	1	1	1	1	0	2	2	-1	1	1	0	-1
phi050	1	1	1	1	1	1	1	2	1	1	0	1	0	2	1	2	1	1	0	1	1	2	1	0	1	1	0	1	1	0	1	1	1	2	2	0	2	1	1	1	1	0	2	1	1	1	1	0	0
umc1589	1	1	0	1	1	1	1	1	1	1	0	1	0	2	1	2	1	1	0	1	1	2	1	0	1	1	0	1	1	0	1	1	1	2	2	0	2	1	1	0	1	0	2	1	1	0	1	0	0
bnlg1074	1	1	0	1	1	1	1	1	1	1	0	1	0	2	1	2	1	1	-1	1	1	2	2	0	1	1	0	1	1	0	1	1	1	2	2	0	2	1	1	1	1	1	2	1	1	-1	1	0	0
umc2003	1	1	0	1	1	1	1	1	1	1	0	1	0	2	1	2	1	2	0	1	1	2	2	0	1	1	0	1	1	0	1	1	1	2	2	0	2	1	1	0	1	0	2	1	-1	0	1	0	0
umc1506	1	1	1	1	1	1	1	1	1	2	0	1	0	2	1	2	1	1	0	1	1	2	2	0	1	1	0	1	1	0	1	1	1	2	2	1	2	1	1	0	1	1	2	1	1	0	1	0	0
bnlg594	0	1	0	1	1	1	1	0	2	1	0	0	1	2	2	2	1	1	0	1	1	2	2	0	1	1	1	1	0	0	1	1	1	2	1	1	2	0	1	0	0	2	1	1	1	0	0	2	1
umc1993	0	1	0	1	1	1	1	0	2	2	0	0	1	2	2	2	2	1	0	1	1	2	2	0	1	1	1	1	0	0	1	1	1	2	1	1	1	0	1	0	0	2	1	2	1	0	0	2	1
bnlg1677	0	1	0	1	1	2	1	0	2	1	2	0	1	2	2	2	2	1	0	1	1	2	2	0	1	1	1	1	0	0	1	2	1	2	1	1	1	0	1	0	0	2	1	2	1	0	0	2	1
umc2351	0	0	0	1	1	2	1	0	2	1	2	0	1	1	2	2	1	1	0	1	1	2	2	0	1	2	1	1	0	0	1	1	1	2	1	1	1	0	1	0	0	1	1	2	2	0	0	2	1
bnlg1450	0	0	0	2	1	2	1	-1	-1	1	2	0	1	1	2	2	1	1	0	0	0	2	2	1	1	2	1	1	1	0	2	1	1	2	1	1	1	0	1	0	0	1	1	2	2	0	0	2	1
umc2021	1	0	0	2	1	2	1	1	2	1	1	0	1	1	2	2	1	1	0	0	0	2	2	1	1	2	1	1	1	0	2	1	1	1	1	1	1	0	1	1	0	1	1	2	2	0	1	2	1
zmrr2pcr	1	0	-1	2	1	2	1	1	2	1	2	0	1	1	2	2	-1	1	0	0	1	2	2	1	1	1	1	1	1	0	2	1	1	1	1	1	1	0	1	1	0	1	1	2	2	0	1	2	1
bnlg1185	1	0	0	2	1	2	1	1	2	1	2	0	1	1	2	2	1	1	0	0	1	2	2	1	1	1	1	1	1	0	2	1	1	1	-1	1	1	0	1	1	0	1	1	2	2	0	2	2	1
umc1038	1	0	0	2	1	2	1	1	2	1	2	0	0	0	2	2	1	1	0	0	1	2	2	1	1	1	1	1	1	1	2	1	1	1	1	1	1	1	1	1	0	1	1	2	2	0	2	2	1
Phenotypes
field traits	environment	FT1	FT2	FT3	FT4	FT5	FT6	FT7	FT8	FT9	FT10	FT11	FT12	FT13	FT14	FT15	FT16	FT17	FT18	FT19	FT20	FT21	FT22	FT23	FT24	FT25	FT26	FT27	FT28	FT29	FT30	FT31	FT32	FT33	FT34	FT35	FT36	FT37	FT38	FT39	FT40	FT41	FT42	FT43	FT44	FT45	FT46	FT47	FT48
leaf area(cm2)	E1	607.186	515.087	503.293	478.8	413.185	479.309	509.128	430.124	-100	418.706	648.945	475.087	422.245	393.042	510.272	460.39	412.514	347.298	359.344	439.043	377.512	384.218	-100	337.221	328.186	366.146	312.616	259.812	-100	344.189	325.091	431.46	312.466	327.723	360.982	344.596	397.433	-100	367.896	-100	500.692	468.89	448.57	409.615	504.298	-100	-100	496.623
	E2	561.602	505.04	476.2	478.8	400.099	463.972	476.815	430.124	-100	379.502	648.945	475.087	403.664	357.202	510.272	421.765	350.975	347.298	311.336	391.302	315.555	321.54	-100	288.122	283.99	298.409	312.616	259.812	-100	292.464	263.156	342.399	255.035	282.781	313.915	307.834	397.433	-100	367.896	-100	500.692	412.637	391.329	389.533	448.327	-100	-100	484.649
	E3	652.771	525.134	530.386	478.8	426.272	494.647	541.441	430.124	-100	457.91	648.945	475.087	440.827	428.882	510.272	499.015	474.052	347.298	407.351	486.785	439.469	446.895	-100	386.32	372.382	433.883	312.616	259.812	-100	395.914	387.027	520.522	369.897	372.664	408.048	381.358	397.433	-100	367.896	-100	500.692	525.143	505.812	429.698	560.27	-100	-100	508.596
plant height(m)	E1	1.84187	2.06813	1.95205	1.28	1.89625	1.89187	2.04655	1.805	-100	1.73607	2.2	1.82	1.83857	1.5675	2.2	1.74214	1.78339	1.48667	1.62437	1.75937	1.7975	1.655	-100	1.54313	1.425	1.89	1.91288	1.62875	-100	1.7875	1.66688	2.42869	1.69687	1.50812	1.85312	1.57329	1.7325	-100	1.72125	-100	2.03	1.85	1.77996	1.8225	2.06312	-100	-100	2.05107
	E2	1.77844	2.08344	1.81246	1.28	1.87938	1.86469	1.99899	1.805	-100	1.67161	2.2	1.82	1.80786	1.50438	2.2	1.67393	1.64295	1.48667	1.52719	1.67531	1.6875	1.53563	-100	1.45344	1.33688	1.96625	1.91288	1.62875	-100	1.69063	1.55031	2.07518	1.57531	1.41906	1.73281	1.47093	1.7325	-100	1.72125	-100	2.03	1.74375	1.7006	1.72437	1.92906	-100	-100	2.01411
	E3	1.90531	2.05281	2.09165	1.28	1.91312	1.91906	2.09411	1.805	-100	1.80054	2.2	1.82	1.86929	1.63062	2.2	1.81036	1.92384	1.48667	1.72156	1.84344	1.9075	1.77438	-100	1.63281	1.51313	1.81375	1.91288	1.62875	-100	1.88437	1.78344	2.7822	1.81844	1.59719	1.97344	1.67564	1.7325	-100	1.72125	-100	2.03	1.95625	1.85931	1.92063	2.19719	-100	-100	2.08804
stem diameter(cm)	E1	6.6625	6.85	6.55625	6.8	6.1875	7.0125	6.67679	7.52857	-100	5.91696	8.4	5.35	5.85714	5.56875	5.96875	5.27321	4.875	5.23333	5.1	5.8125	5.33125	5.525	-100	5.33125	5.06875	5.0125	4.9625	4.9625	-100	5.525	5.0375	6.49732	5.44375	5.49464	5.2875	5.79	6.025	-100	7.2	-100	6.13125	5.8	6.29643	6.175	5.93125	-100	-100	6.39375
	E2	6.31875	6.89375	6.67812	6.8	6.04375	7.30625	6.55268	7.52857	-100	5.5942	8.4	5.35	5.73571	5.39687	5.69688	5.22232	4.6625	5.23333	4.8625	5.4375	5.08437	5.2875	-100	5.13438	4.82188	4.4625	4.9625	4.9625	-100	5.25	4.48125	5.92723	5.26562	5.35446	5.1	5.485	6.025	-100	7.2	-100	5.71563	5.5125	5.97321	6.175	5.74062	-100	-100	6.39062
	E3	7.00625	6.80625	6.43438	6.8	6.33125	6.71875	6.80089	7.52857	-100	6.23973	8.4	5.35	5.97857	5.74062	6.24062	5.32411	5.0875	5.23333	5.3375	6.1875	5.57812	5.7625	-100	5.52813	5.31562	5.5625	4.9625	4.9625	-100	5.8	5.59375	7.06741	5.62188	5.63482	5.475	6.095	6.025	-100	7.2	-100	6.54688	6.0875	6.61964	6.175	6.12188	-100	-100	6.39687
tassel branch number	E1	12.8125	12.125	9.8125	16	12.8125	13.6875	12.7054	12.5714	-100	13.7143	13	13	9.92857	10.875	10	12.1518	13.875	11.3333	11.0625	15.375	10.25	9.6875	-100	9.0625	11.1875	8.25	9.5	9	-100	9.4375	8.125	10.3125	9.8125	7.51786	12.4375	6.4	15	-100	10	-100	14.9375	10.5625	13.4375	13.1875	13.3125	-100	-100	17.5
	E2	11.7188	13.25	7.90625	16	13.0312	13.7188	11.9955	12.5714	-100	13.5714	13	13	9.32143	10.4375	9.5625	11.2902	12	11.3333	9.71875	14.1875	8.9375	8.34375	-100	8.78125	10.4688	7.6875	9.5	9	-100	9.03125	6.6875	8.65625	8.78125	6.90179	12.3438	6	15	-100	10	-100	13.3438	9.09375	11.6562	11.6562	12.0938	-100	-100	16
	E3	13.9062	11	11.7188	16	12.5938	13.6562	13.4152	12.5714	-100	13.8571	13	13	10.5357	11.3125	10.4375	13.0134	15.75	11.3333	12.4062	16.5625	11.5625	11.0312	-100	9.34375	11.9062	8.8125	9.5	9	-100	9.84375	9.5625	11.9688	10.8438	8.13393	12.5312	6.8	15	-100	10	-100	16.5312	12.0312	15.2188	14.7188	14.5312	-100	-100	19
leaf width(cm)	E1	10.3938	9.6625	9.65	8.4	8.09375	8.95	9.2369	7.9625	-100	8.57946	9.9	8.68333	8	8.14375	9.1125	8.57143	7.90804	7.3	7.4875	8.06875	8.1375	8.1375	-100	7.0625	8.09375	7.8625	6.4875	6.8125	-100	7.00625	7.28214	7.87857	7.34107	8.29464	7.91875	7.30571	8.275	-100	8.025	-100	8.8	8.55625	8.22917	8.18125	8.80625	-100	-100	8.09375
	E2	9.99062	9.21875	9.775	8.4	8.00938	8.75	9.04702	7.9625	-100	8.32545	9.9	8.44167	7.93571	7.91563	9.1125	8.29286	7.49777	7.3	7.08125	7.75938	7.68125	7.7	-100	6.7	7.72187	7.25625	6.4875	6.8125	-100	6.54688	6.71607	7.18929	6.78304	7.85446	7.50938	6.93857	8.275	-100	8.025	-100	8.8	8.14687	7.80208	8.06563	8.42188	-100	-100	7.96563
	E3	10.7969	10.1062	9.525	8.4	8.17812	9.15	9.42679	7.9625	-100	8.83348	9.9	8.925	8.06429	8.37187	9.1125	8.85	8.3183	7.3	7.89375	8.37813	8.59375	8.575	-100	7.425	8.46562	8.46875	6.4875	6.8125	-100	7.46563	7.84821	8.56786	7.89911	8.73482	8.32812	7.67286	8.275	-100	8.025	-100	8.8	8.96562	8.65625	8.29688	9.19063	-100	-100	8.22188
leaf length(cm)	E1	77.45	71.425	69.7804	76	68.0062	71.3438	73.2321	72.025	-100	64.5759	87.4	77.8917	70.2929	63.8937	74.6625	71.1357	68.1321	63.4333	62.875	71.7625	60.3375	61.4562	-100	62.4188	53.175	59.975	64.25	50.85	-100	64.0206	57.3839	69.8833	54.8482	51.7295	59.7812	62.17	64.0375	-100	61.125	-100	75.8625	72.05	71.525	66.625	75.45	-100	-100	81.7687
	E2	74.6063	73.3187	65.133	76	66.5594	70.6531	70.0732	72.025	-100	60.3951	87.4	77.5708	67.7607	59.8156	74.6625	67.4393	61.2911	63.4333	57.7375	66.625	53.5688	54.4906	-100	56.3531	48.3375	53.1125	64.25	50.85	-100	58.3747	50.5045	60.925	48.5866	47.2504	54.9469	58.585	64.0375	-100	61.125	-100	75.8625	66.7313	65.9625	64.2938	70.2687	-100	-100	81.0906
	E3	80.2938	69.5312	74.4277	76	69.4531	72.0344	76.3911	72.025	-100	68.7567	87.4	78.2125	72.825	67.9719	74.6625	74.8321	74.9732	63.4333	68.0125	76.9	67.1063	68.4219	-100	68.4844	58.0125	66.8375	64.25	50.85	-100	69.6666	64.2634	78.8417	61.1098	56.2085	64.6156	65.755	64.0375	-100	61.125	-100	75.8625	77.3688	77.0875	68.9562	80.6312	-100	-100	82.4469
[truncated: 132 more columns]
